# Supplementary material
Source: PubMed Central journal article supplement (PMC1796967)
Supplement: aem_73_2_407__1.pdf [file aem_73_2_407__1.pdf]

Table S1. Phylogenetic affiliation of the enrichment cultures and isolates.

| Depth Interval (cm) <sup>a</sup> | Enrichment Type           | Phylogenetic affiliation    |
|----------------------------------|---------------------------|-----------------------------|
| 0-5                              | CO <sub>2</sub> -reducing | <i>Methanogenium</i> sp.    |
| 5-10                             | CO <sub>2</sub> -reducing | <i>Methanogenium</i> sp.    |
|                                  | Methylotrophic            | <i>Methanococcoides</i> sp. |
| 10-15                            | CO <sub>2</sub> -reducing | <i>Methanogenium</i> sp.    |
| 19-24                            | CO <sub>2</sub> -reducing | <i>Methanogenium</i> sp.    |
| 25-30                            | CO <sub>2</sub> -reducing | <i>Methanogenium</i> sp.    |
|                                  | Methylotrophic            | <i>Methanococcoides</i> sp. |
| 33.5-38.5                        | CO <sub>2</sub> -reducing | <i>Methanogenium</i> sp.    |
|                                  | Methylotrophic            | <i>Methanococcoides</i> sp. |
|                                  | Aceticlastic              | <i>Methanosarcina</i> sp.   |
| 40.5-45.5                        | CO <sub>2</sub> -reducing | <i>Methanogenium</i> sp.    |
|                                  | Methylotrophic            | <i>Methanosarcina</i> sp.   |
| 49-53.5                          | CO <sub>2</sub> -reducing | <i>Methanogenium</i> sp.    |
|                                  | Methylotrophic            | <i>Methanococcoides</i> sp. |
| 56-61                            | CO <sub>2</sub> -reducing | <i>Methanogenium</i> sp.    |
| 63-69                            | CO <sub>2</sub> -reducing | <i>Methanogenium</i> sp.    |

<sup>a</sup>Depth interval is the distance from the sediment-water interface.
